# Supplementary material for: Studies of aqueous U(iv) equilibrium and nanoparticle formation kinetics using spectrophotometric reaction modeling analysis
Source: Royal Society of Chemistry journal article supplement (doi:10.1039/d0ra05352j), 2020-01-01
Supplement: d0ra05352j1.pdf [file d0ra05352j1.pdf]

## *Supporting Information*

# **Studies of Aqueous U(IV) Equilibrium and Nanoparticle Formation Kinetics Using Spectrophotometric Reaction Modeling Analysis**

Wansik Cha<sup>\*a</sup>, Hee-Kyung Kim<sup>a</sup>, Hyejin Cho<sup>a</sup>, Hye-Ryun Cho<sup>a</sup>, Euo Chang Jung<sup>a</sup>,  
Seung Yeop Lee<sup>b</sup>

<sup>\*</sup>Corresponding author (e-mail: wscha@kaeri.re.kr)

<sup>a</sup>Nuclear Chemistry Research Laboratory, <sup>b</sup>Radioactive Waste Management Research Division,  
Korea Atomic Energy Research Institute, 989-111 Daedeok-daero, Yuseong-gu, Daejeon 34057,  
Republic of Korea

[Ionic strength correction using SIT formula]

The measured conditional stability constant,  $\log^* \beta_1$  was converted to the standard constants,  $\log^* \beta_1^\circ$  at the standard condition ( $I = 0$ ,  $T = 25^\circ\text{C}$ ) by correcting the effects of  $I$  and adopting activity coefficient terms ( $\log \gamma$ ) as shown in Eq. (S1).

$$^* \beta_1 = \frac{[\text{U}(\text{OH})^{3+}][\text{H}^+]}{[\text{U}^{4+}]}$$

$$\log^* \beta_1 = \log^* \beta_1^\circ + \log \gamma_{\text{U}^{4+}} - \log \gamma_{\text{UOH}^{3+}} - \log \gamma_{\text{H}^+} + \log a_{\text{H}_2\text{O}} \quad (\text{S1})$$

Equilibria involving  $\text{H}_2\text{O}(\text{l})$  as a reactant or product require a correction for the water activity ( $a_{\text{H}_2\text{O}}$ ). The  $\log_{10} a_{\text{H}_2\text{O}}$  were calculated from the  $a_{\text{H}_2\text{O}}$  values at  $25^\circ\text{C}$  provided in NEA-TDB for  $\text{NaClO}_4$  (see Table S1). The SIT formula for activity coefficients is:

$$\log_{10} \gamma_i = -z_i^2 D(I_m) + \sum_j \varepsilon(i, j) m_j \quad (\text{S2})$$

where  $z_i$  is the charge of ion  $i$ .

$$D(I_m) = \frac{A \sqrt{I_m}}{1 + B a_d \sqrt{I_m}} \quad (\text{S3})$$

is a Debye-Hückel term where  $I_m$  is the molal ionic strength;  $A$  and  $B$  are Debye-Hückel constants;  $a_d$  is the size or effective diameter of the ion in angstrom;  $B \cdot a_d$  in Eq. (S3) is considered as a constant ( $= 1.5$ ). In Eq. (S2), the binary ion interaction coefficients ( $\varepsilon$ ) for the pair of species  $i$  and  $j$  are assumed to be equal to zero for neutral species or for ions of the same sign. Thus, for the cations involved in 1:1 U(IV) hydrolysis the summation in Eq. (S1) is restricted to the  $\text{ClO}_4^-$  counter ion ( $= j$ ) that was chosen for ionic strength control in this work. The values of  $a_{\text{H}_2\text{O}}$  and  $A$ ,  $B \cdot a_d$  used in this work are listed in Tables S1 and S2, which were extracted from the literature. For the  $B \cdot a_d$  and  $a_{\text{H}_2\text{O}}$  terms we assume that these values are constant within the temperature range ( $0\text{--}30^\circ\text{C}$ ) in this study, thus the values at RT in Tables S1 and S2 were used for the calculation of  $\log^* \beta_1^\circ$  at other temperatures, i.e.,  $\log^* \beta_1^\circ(T)$ .

[Tables]

**Table S1.** Water activity used in this study (see Eq. (S1)).

| $I$ (m) | $a_{\text{H}_2\text{O}}$ |
|---------|--------------------------|
| 0.02    | 0.9993                   |
| 0.05    | 0.9983                   |
| 0.10    | 0.9966                   |
| 0.15    | 0.9948                   |
| 0.51    | 0.9833                   |
| 1.05    | 0.9660                   |
| 2.09    | 0.9337                   |

Note. Values for  $\text{NaClO}_4$  media are adapted from NEA-TDB (Ref. [3] in the main text). Some values are extrapolated.

**Table S2.** Debye-Hückel constants used in Eq. (S3).

| T (°C) | A      | $\text{Ba}_d$ |
|--------|--------|---------------|
| 0      | 0.4913 |               |
| 5      | 0.4943 |               |
| 10     | 0.4976 |               |
| 15     | 0.5012 | 1.5           |
| 20     | 0.5050 |               |
| 25     | 0.5091 |               |
| 30     | 0.5135 |               |

Note. All values are adapted from Ref.[3] in the main text.

**Table S3.** Comparison of the binary ion interaction coefficient ( $\Delta\varepsilon$ ) obtained in this work and those from literatures.

| $\Delta\varepsilon^a$<br>(kg/mol)                                                 | References             |
|-----------------------------------------------------------------------------------|------------------------|
| $-(0.14 \pm 0.05)$                                                                | Ref. [3]               |
| $-(0.21 \pm 0.04)$                                                                | this work <sup>b</sup> |
| $\Delta\varepsilon_1 = -(0.28 \pm 0.03)$<br>$\Delta\varepsilon_2 = 0.28 \pm 0.06$ | Ref. [4]               |
| $\Delta\varepsilon_1 = -(0.30 \pm 0.05)$<br>$\Delta\varepsilon_2 = 0.32 \pm 0.08$ | this work <sup>c</sup> |

<sup>a</sup>  $\Delta\varepsilon$  at  $I = 0$  ( $= \varepsilon(\text{UOH}^{3+}, j) + \varepsilon(\text{H}^+, j) - \varepsilon(\text{U}^{4+}, j), j = \text{ClO}_4^-$ ).

<sup>b</sup>  $\Delta\varepsilon$  was calculated by adding  $\varepsilon(\text{H}^+, \text{ClO}_4^-)$  to  $\Delta\varepsilon'$  presented in Table 1 in the main text.

<sup>c</sup> Based on the two-parameter SIT model in Ref. [4];  $\Delta\varepsilon = \Delta\varepsilon_1 + \Delta\varepsilon_2 \log I$

**Table S4.** Dependence of  $\Delta_r H_m$  and  $\Delta_r S_m$  on  $I$ . Each conditional constant was calculated from the individual van't Hoff plots ( $\log^* \beta_1$  vs.  $1/T$ ) in Fig. 4(b).

| Test<br>(pH <sub>c</sub> ) | $I$<br>(mol/kg) | T<br>(°C) | $\Delta_r H_m$<br>(kJmol <sup>-1</sup> ) | $\Delta_r S_m$<br>(JK <sup>-1</sup> mol <sup>-1</sup> ) |
|----------------------------|-----------------|-----------|------------------------------------------|---------------------------------------------------------|
| C<br>(1.70)                | 0.02            | 0 ~ 30    | $41.4 \pm 0.5$                           | $121 \pm 2$                                             |
|                            | 0.05            |           | $42.8 \pm 0.6$                           | $124 \pm 2$                                             |
|                            | 0.10            |           | $41.3 \pm 0.5$                           | $117 \pm 2$                                             |
|                            | 0.20            |           | $40.2 \pm 0.6$                           | $111 \pm 2$                                             |
|                            | 0.51            |           | $40.1 \pm 0.5$                           | $109 \pm 2$                                             |
|                            | 1.05            |           | $38.1 \pm 0.4$                           | $100 \pm 2$                                             |

**Table S5.** Comparison of the reaction enthalpy and entropy data measured in this work and those from literatures for the first hydrolysis of  $U^{4+}$  in aqueous H/NaClO<sub>4</sub> solution.

| T<br>(°C)   | <i>I</i> | $\Delta_r H_m$<br>(kJmol <sup>-1</sup> ) | $\Delta_r S_m$<br>(JK <sup>-1</sup> mol <sup>-1</sup> ) | References                               |
|-------------|----------|------------------------------------------|---------------------------------------------------------|------------------------------------------|
| 0 – 30      | 0        | 43.4 ± 3.0 <sup>a</sup>                  | 136 ± 11 <sup>a</sup>                                   | this work                                |
|             | 0.15 m   | 41.6 ± 2.8 <sup>a</sup>                  | 117 ± 10 <sup>a</sup>                                   |                                          |
| 10 – 150    | 0        | 46.9 ± 9.0                               | 147 ± 30                                                | Ref. [3]                                 |
| 25 – 150    | 0        | 42.9 ± 3.3 <sup>b</sup>                  | 135 ± 10 <sup>b</sup>                                   | Ref. [4]                                 |
| 0 – 150     | 0        | 43.3 ± 2.2 <sup>c</sup>                  | 136 ± 7 <sup>c</sup>                                    | this work                                |
| 15.2 – 24.7 | 0.19 M   | 44.3 ± 6                                 | 126 ± 20                                                | Ref. [S1],<br>re-estimated in<br>Ref.[5] |
| 10, 43      | 0.5 M    | 46.9 ± 3                                 | 129 ± 10                                                | Ref. [S2],<br>re-estimated in<br>Ref.[5] |
| 25 – 100    | 0.5 m    | 42 ± 7                                   | -                                                       | Ref. [S3],                               |
| 50 – 125    | 0.99 m   | 45 ± 7                                   | -                                                       | re-estimated in                          |
| 25 – 150    | 0        | 46 ± 4                                   | 143 ± 14                                                | Ref.[5]                                  |

<sup>a</sup> Data taken from Table 3 in the main text.

<sup>b</sup> Data calculated from the plot of Fig. S6 using  $\log^* \beta_1^\circ$  values listed in Table 9.6 of Ref. [4].

<sup>c</sup> Reestimated values from the combined data from Table 3 and Ref. [4](see Fig. S6).

**Table S6.** Stability constants for the first hydrolysis of  $U^{4+}$ , which were used in Fig. S5.

| Temp.<br>(°C) | I<br>(mol kg <sup>-1</sup> ) | $\log^*\beta$<br>(accepted) | $\log^*\beta + 6D - \log a(H_2O)$ | Reference                  |
|---------------|------------------------------|-----------------------------|-----------------------------------|----------------------------|
| 25            | 0.017                        | -(0.92 ± 0.17)              | -0.587                            |                            |
| 25            | 0.033                        | -(1.07 ± 0.17)              | -0.634                            |                            |
| 25            | 0.035                        | -(1.00 ± 0.17)              | -0.553                            |                            |
| 25            | 0.045                        | -(1.10 ± 0.17)              | -0.608                            |                            |
| 25            | 0.063                        | -(1.14 ± 0.17)              | -0.582                            |                            |
| 25            | 0.111                        | -(1.22 ± 0.10)              | -0.540                            |                            |
| 25            | 0.111                        | -(1.28 ± 0.10)              | -0.600                            |                            |
| 25            | 0.121                        | -(1.23 ± 0.10)              | -0.530                            | Ref. [S4]                  |
| 25            | 0.121                        | -(1.29 ± 0.10)              | -0.590                            |                            |
| 25            | 0.274                        | -(1.35 ± 0.10)              | -0.450                            |                            |
| 25            | 0.513                        | -(1.53 ± 0.10)              | -0.468                            |                            |
| 25            | 0.534                        | -(1.50 ± 0.10)              | -0.427                            |                            |
| 25            | 0.534                        | -(1.49 ± 0.10)              | -0.417                            |                            |
| 25            | 0.565                        | -(1.44 ± 0.10)              | -0.353                            |                            |
| 25            | 1.06                         | -(1.54 ± 0.10)              | -0.289                            |                            |
| 25            | 2.21                         | -(1.59 ± 0.10)              | -0.153                            | Ref. [4]                   |
| 25            | 3.5                          | -(1.88 ± 0.20)              | -0.331                            | Ref. [S5]                  |
| 25            | 2.21                         | -(1.64 ± 0.10)              | -0.203                            | Ref. [S6]                  |
| 25            | 3.5                          | -(1.58 ± 0.10)              | -0.031                            | Ref. [S7]                  |
| 24.7          | 0.192                        | -(1.08 ± 0.10)              | -0.270                            | Ref. [S1]                  |
| 25            | 1.05                         | -(1.61 ± 0.09)              | -0.361                            | Ref. [S8]                  |
| 25            | 3.5                          | -(1.55 ± 0.10)              | -0.001                            | Ref. [S9]                  |
| 25            | 0.25                         | -(1.44 ± 0.20)              | -0.564                            |                            |
| 25            | 0.36                         | -(1.30 ± 0.20)              | -0.330                            |                            |
| 25            | 0.48                         | -(1.39 ± 0.20)              | -0.345                            |                            |
| 25            | 0.51                         | -(1.21 ± 0.20)              | -0.149                            |                            |
| 25            | 0.65                         | -(1.31 ± 0.20)              | -0.186                            | Ref. [S3]                  |
| 25            | 0.75                         | -(1.44 ± 0.20)              | -0.278                            |                            |
| 25            | 0.86                         | -(1.54 ± 0.20)              | -0.343                            |                            |
| 25            | 0.99                         | -(1.68 ± 0.20)              | -0.446                            |                            |
| 25            | 1.09                         | -(1.72 ± 0.20)              | -0.461                            |                            |
| 26            | 0.02                         | -(0.94 ± 0.06)              | -0.586                            |                            |
| 26            | 0.05                         | -(1.05 ± 0.07)              | -0.541                            |                            |
| 26            | 0.101                        | -(1.17 ± 0.06)              | -0.506                            | This work                  |
| 26            | 0.202                        | -(1.25 ± 0.04)              | -0.425                            | (Table 3 of the main text) |
| 26            | 0.513                        | -(1.37 ± 0.05)              | -0.311                            |                            |
| 26            | 1.051                        | -(1.48 ± 0.05)              | -0.228                            |                            |
| 26            | 2.091                        | -(1.55 ± 0.03)              | -0.131                            |                            |

[Figures]

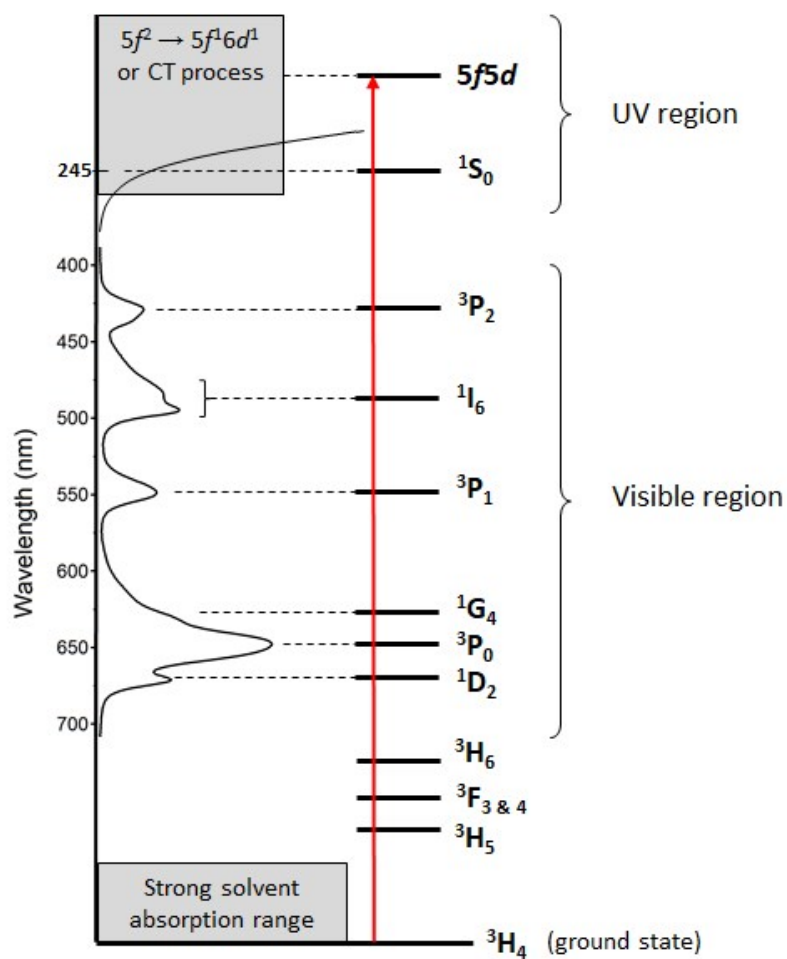

**Fig. S1.** Electronic energy states of  $U^{4+}$  ( $5f^2$ ). The arrow denotes for the transition to the UV region. (adapted from Ref. [23] in the main text)

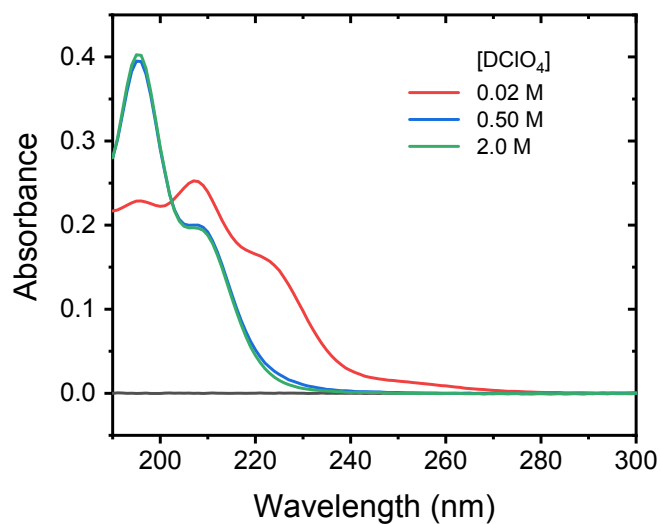

**Fig. S2.** Absorption spectra of D<sub>2</sub>O solutions containing U(IV) (0.7 mM) in the UV region (OPL = 1 mm,  $I \sim [\text{DClO}_4]$ , H/D in solution =  $\sim 0.01$ ). The absorption spectra are nearly identical with those obtained in the HClO<sub>4</sub>/H<sub>2</sub>O solution as shown in Figs. 1 and 2 in the main text.



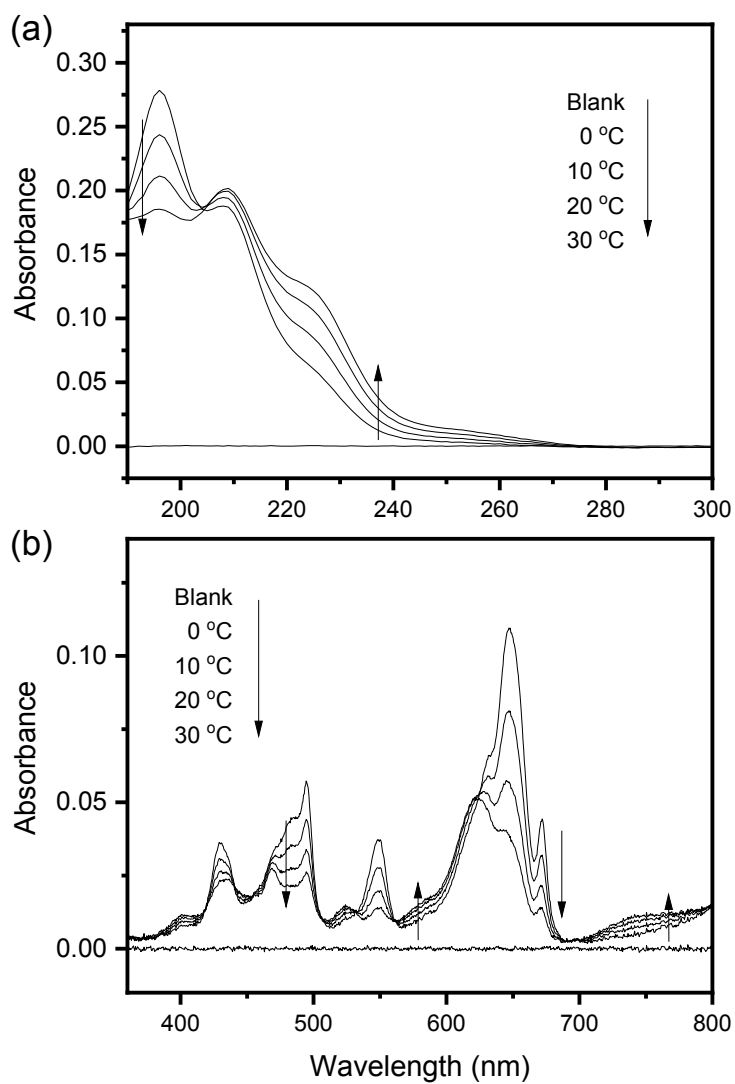

**Fig. S3.** Temperature-dependent changes of the absorption spectrum of aqueous solutions at  $\text{pH}_c = 1.70$  and  $I = 0.15$  m in the (a) UV region and (b) visible regions (OPL = 1 mm and 10 mm;  $[\text{U(IV)}]$ , 0.7 mM and 2.8 mM, respectively).

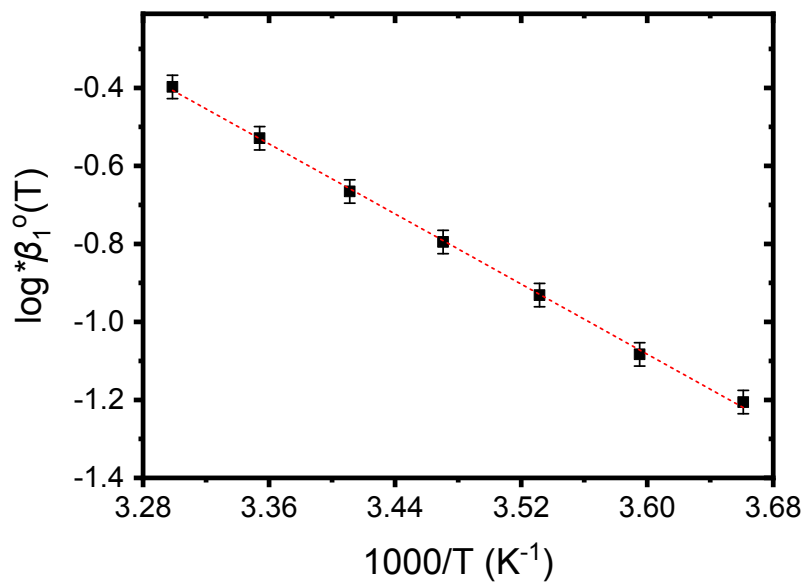

**Fig. S4.** Van't Hoff plot using  $\log^*\beta_1^\circ(T)$  calculated from the ionic strength correction shown in Fig. 4(c) (Test C at  $\text{pH}_c = 1.70$ ,  $0 - 30^\circ\text{C}$ ). Dotted lines indicate linear fit results. The standard state constants,  $\Delta_r H_m^\circ$  and  $\Delta_r S_m^\circ$ , were determined to  $43.0 \pm 3.2$   $\text{kJmol}^{-1}$  and  $134 \pm 11$   $\text{JK}^{-1}\text{mol}^{-1}$ , respectively, which are within the uncertainty range of the representative values in this work as shown in Table 3.

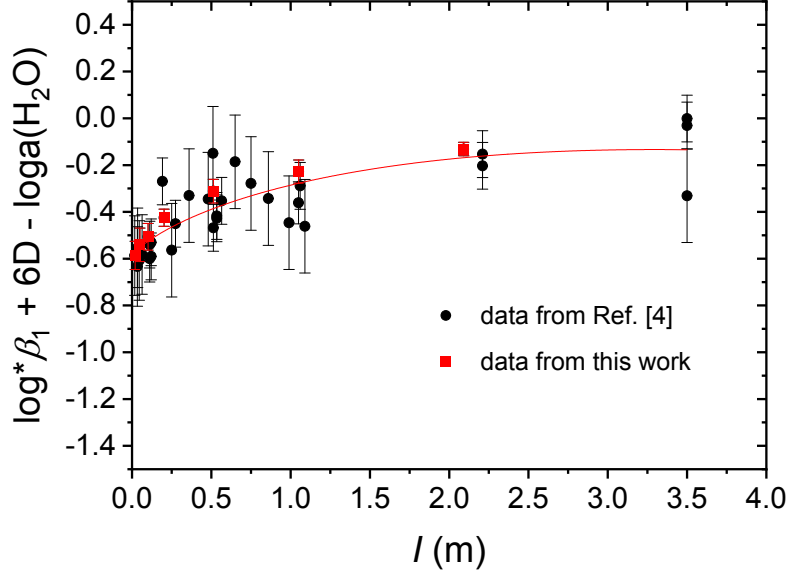

**Fig. S5.** Ionic strength dependence of  $\log^*\beta_1$  for the first hydrolysis of  $U^{4+}$  in perchlorate media. All available stability constants at 25 °C in the literature and those in Table 3 in the main text are combined, which are listed in Table S6. The solid line is the non-linear regression fitting result for the whole data by using the two-parameter SIT model ( $\Delta\varepsilon = \Delta\varepsilon_1 + \Delta\varepsilon_2 \log I$ , see Eq. (S4)) as described in Ref. [4]. As a result two terms of ion-interaction coefficients ( $\Delta\varepsilon_1$  and  $\Delta\varepsilon_2$ ) and  $\log^*\beta_1^\circ$  are derived and summarized in the table below.

$$Y = \log^*\beta_1 + 6D(I_m) - \log a_{H_2O} = \log^*\beta_1^\circ - I_m (\Delta\varepsilon_1 + \Delta\varepsilon_2 \log I_m) \quad (S4)$$

| $\Delta\varepsilon_1$<br>(kg mol <sup>-1</sup> ) | $\Delta\varepsilon_2$<br>(kg mol <sup>-1</sup> ) | $\log^*\beta_1^\circ$ |
|--------------------------------------------------|--------------------------------------------------|-----------------------|
| $-(0.30 \pm 0.05)$                               | $0.32 \pm 0.08$                                  | $-(0.59 \pm 0.08)$    |

\* Note that non-weighted regression analysis and Levenberg Marquardt iteration algorithm were used.

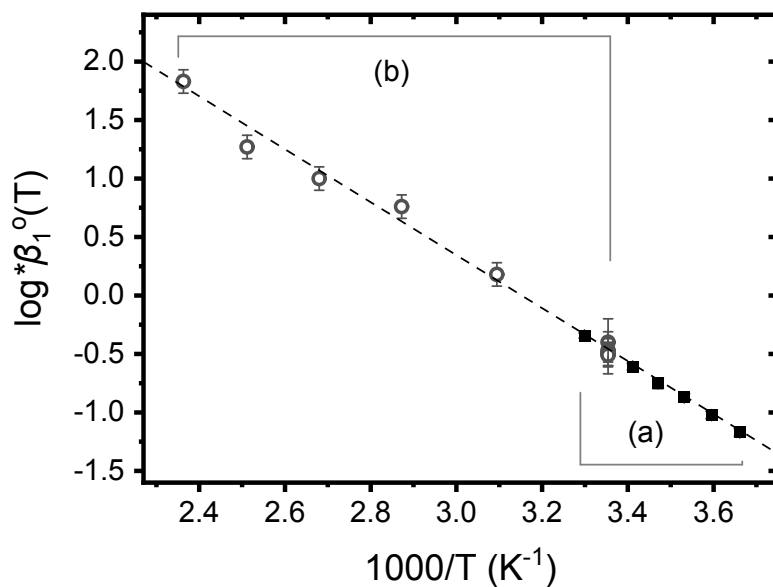

**Fig. S6.** Van't Hoff plot using the combined  $\log^*\beta_1^\circ(T)$  data from (a) this work (Table 3 in the main text) and (b) Ref. [4] (Table 9.6, 25 – 150 °C). The dotted line indicates a weighted linear fit result. The new standard state constants,  $\Delta_r H_m^\circ$  and  $\Delta_r S_m^\circ$ , are determined to  $43.3 \pm 2.2 \text{ kJmol}^{-1}$  and  $136 \pm 7 \text{ JK}^{-1}\text{mol}^{-1}$ , respectively. The constants calculated for the data only from (b) are also shown in Table S5.

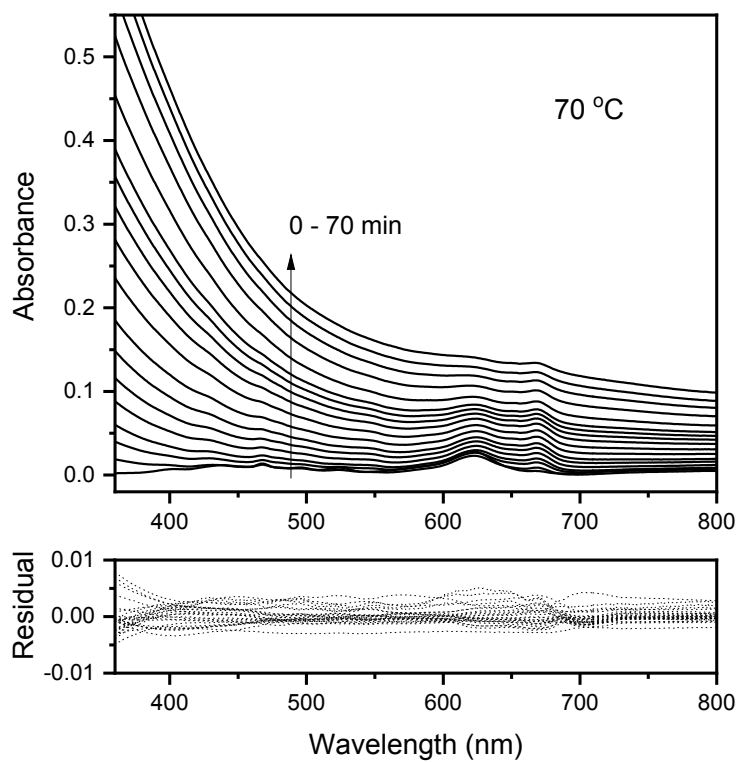

**Fig. S7.** Residual plot (bottom) obtained after the kinetic reaction modeling analysis of the spectrophotometric data set of Fig. 6(a) in the main text.

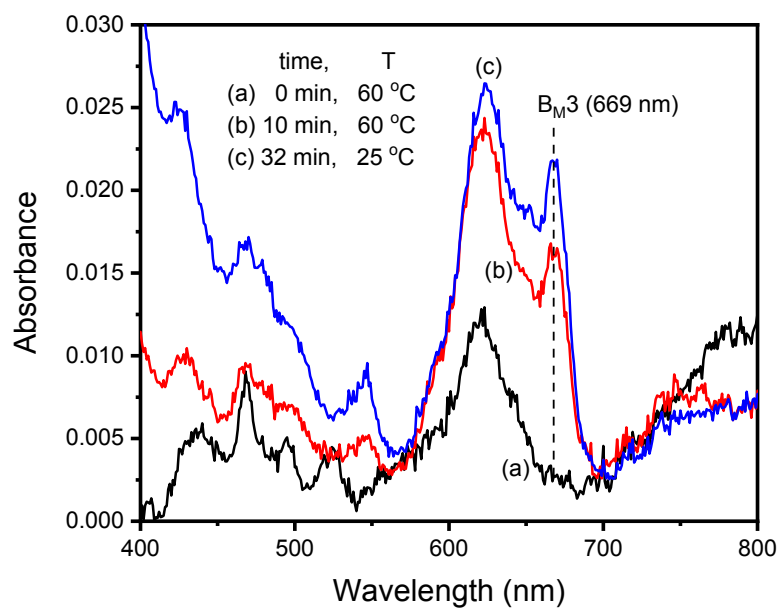

**Fig. S8.** Kinetic spectral data demonstrating the irreversible evolution of the intermediate (M) at 60 °C (OPL = 10 mm; [U(IV)] = 1.0 mM; pH 2.2;  $I = 0.1$  m). The reaction temperature lowered to 25 °C after 10 min when the B<sub>M</sub>3 band of M was evident. In the (c) spectrum the peak of the B<sub>M</sub>3 did not disappear, instead, it increased during the period of temperature change from 60 to 25 °C. This strongly supports that the first step ( $k_1$ ) of the proposed U(IV)-NP formation scheme is kinetically irreversible.

[References]

- S1. R. H. Betts, *Can. J. Chem.*, 1955, **33**, 1775-1779.
- S2. K.A. Kraus, F. Nelson, *J. Am. Chem. Soc.*, 1955, **77**, 3721-3722.
- S3. N. M. Nikolaeva, *Izv.Sib.Otd. Akad. Nauk SSSR, Ser. Khim. Nauk*, 1978, **4**, 91-95.
- S4. K.A. Kraus, F. Nelson, *J. Am. Chem. Soc.*, 1950, **72**, 3901-3906.
- S5. S. Hietanen, *Acta Chem. Scand.*, 1956, **10**, 1531-1546.
- S6. J.C. Sullivan, and J.C. Hindman, *J. Phys. Chem.*, 1959, **63**, 1332-1333.
- S7. I. Grenthe, G. Bidoglio, N. Omenetto, *Inorg. Chem.*, 1989, **28**, 71-74.
- S8. C. Ekberg, P. Brown, J. Comarmond, and Y. Albinsson, *Mater. Res. Soc. Symp. Proc.*, 2001, **663**, 1091-1099.
- S9. C. Manfredi, V. Caruso, E. Vasca, S. Vero, E. Ventimiglia, G. Palladino, and D. Ferri, *J. Solution Chem.*, 2006, **35**, 927-937.
